# Supplementary material for: Divergent early mesoderm specification underlies distinct head and trunk muscle programmes in vertebrates
Source: Oxford University Press journal article supplement (doi:10.1242/dev.160945), 2018-09-15
Supplement: dev160945supp.pdf [file dev160945supp.pdf]

## Supplementary Tables:

Table S1. Source of mouse strains used in the study

| Strain                         | Reference                  | Our source                                                                        |
|--------------------------------|----------------------------|-----------------------------------------------------------------------------------|
| <i>Tg:Axin2-d2EGFP</i>         | Jho et al., 2002           | Tole, S., DBS, TIFR-Mumbai                                                        |
| <i>Mesp1<sup>Cre</sup></i>     | Saga et al., 1999          | Meilhac, S., Institut Imagine, Paris                                              |
| <i>Tg:Tbx6-Cre</i>             | Javali et al., 2017        | Generated by us                                                                   |
| <i>Tbx6<sup>H2B-EYFP</sup></i> | Hadjantonakis et al., 2008 | Papaioannou, V., Columbia University<br>Medical Center, New York<br>Stock# 004591 |
| <i>T<sup>Wis</sup></i>         | Shedlovsky et al., 1988    | The Jackson Laboratory, USA Stock#<br>007676                                      |
| <i>ROSA<sup>mTmG</sup></i>     | Muzumdar et al., 2007      | The Jackson Laboratory, USA                                                       |
| <i>ROSA<sup>nlacZ</sup></i>    | Tzouanacou et al., 2009    | Tajbakhsh, S., Institut Pasteur, Paris                                            |
| <i>Myf5<sup>nlacZ</sup></i>    | Tajbakhsh et al., 1997     | Tajbakhsh, S., Institut Pasteur, Paris                                            |
| <i>Pax7<sup>GPL</sup></i>      | Sambasivan et al., 2009    | Tajbakhsh, S., Institut Pasteur, Paris                                            |

**Table S2. Small molecules and growth factors**

| <b>Name</b>   | <b>Company</b> | <b>Catalog no.</b> | <b>Concentration</b> |
|---------------|----------------|--------------------|----------------------|
| Activin A     | R&D            | 338-AC-050         | 20 ng/mL             |
| Ascorbic Acid | SIGMA          | 4403-100MG         | 0.5 mM               |
| Bmp4          | R&D            | 314-BP-010         | 10 ng/mL             |
| CHIR99021     | Tocris         | 4423/10            | 8 $\mu$ M            |
| Dkk1          | R&D            | 5439-DK-010        | 150 ng/mL            |
| FGF2          | Peptotech      | AF-100-18B-100     | 5-20 ng/mL           |
| Fgf10         | R&D            | 345-FG-025         | 50 ng/mL             |
| HGF           | R&D            | 2207-HG-025        | 10 ng/mL             |
| iCRT3         | SIGMA          | SML0211-5MG        | 10 $\mu$ M           |
| iCRT5         | Abcam          | ab142141           | 50 $\mu$ M           |
| IGF-1         | Peptotech      | 250-19-10          | 2 ng/mL              |
| LDN193189     | Stemcell       | 72142              | 0.1 $\mu$ M          |
| SB431542      | Tocris         | 1614/10            | 10 $\mu$ M           |
| VEGF          | R&D            | 493-MV-005         | 5 ng/mL              |
| Xav939        | SIGMA          | X3004-5MG          | 5 $\mu$ M            |

**Table S3. Antibody sources and dilutions**

| Antigen                                          | Company                     | Catalog no.         | Dilution (IF) | Dilution (WB) | Dilution (FACS)                        |
|--------------------------------------------------|-----------------------------|---------------------|---------------|---------------|----------------------------------------|
| 7-Aminoactinomycin D                             | ThermoFisher Scientific     | A1310               |               |               | 10 $\mu$ g/mL                          |
| $\alpha$ -Actinin                                | SIGMA                       | A7811               | 1:200         |               |                                        |
| $\beta$ -actin                                   | SIGMA                       | A5316-.2ML          |               | 1:500         |                                        |
| $\beta$ -catenin                                 | Abcam                       | ab16051             |               | 1:2500        |                                        |
| CD31                                             | BD                          | 550274              | 1:200         |               |                                        |
| cardiac TroponinI                                | Abcam                       | ab47003             | 1:120         |               |                                        |
| cardiac TroponinT                                | ThermoFisher Scientific     | MA5-12960           | 1:200         |               |                                        |
| Desmin                                           | SIGMA                       | D1033               | 1:40          |               |                                        |
| Eomes                                            | Abcam                       | ab23345             | 1:200         |               |                                        |
| Flk-1/CD309                                      | ThermoFisher Scientific     | 12-5821-82          |               |               | 0.5 $\mu$ g /<br>10 <sup>6</sup> cells |
| GFP                                              | Abcam                       | ab13970             | 1:300         |               |                                        |
| Isl1                                             | DSHB                        | 40.2D6              | 1:100         |               |                                        |
| Myod                                             | Dako                        | M351201-2           | 1:100         |               |                                        |
| Myogenin                                         | DSHB                        | F5D                 | 1:10          |               |                                        |
| Myosin heavy chain<br>(Skeletal muscle specific) | SIGMA                       | M4276               | 1:100         |               |                                        |
| Nkx2.5                                           | ThermoFisher Scientific     | PA5-49431           | 1:50          |               |                                        |
| Oct3/4                                           | SantaCruz Biotechnology     | sc-8628             | 3 $\mu$ g/mL  |               |                                        |
| PDGFR $\alpha$ /CD140a                           | ThermoFisher Scientific     | 62-1401-82          |               |               | 1.0 $\mu$ g /<br>10 <sup>6</sup> cells |
| phospho-Smad2                                    | Cell Signaling Technologies | 3108S               |               | 1:1000        |                                        |
| Pax3                                             | DSHB                        | C1-575              | 1:150         |               |                                        |
| Sox2                                             | SantaCruz Biotechnology     | sc17320             | 1:67          |               |                                        |
| Total Smad2/3                                    | Cell Signaling Technologies | 5678S               |               | 1:1000        |                                        |
| T/Brachyury                                      | SantaCruz Biotechnology     | sc-17743            | 3 $\mu$ g/mL  |               |                                        |
| Tbx1                                             | Abcam                       | ab18530             | 1:100         |               |                                        |
| Tbx1                                             | ThermoFisher Scientific     | PA5-26389           | 1:100         |               |                                        |
| Tbx6                                             | Imagenex                    | custom<br>generated |               |               |                                        |

**Table S4. Mouse RT-qPCR primers**

| Gene    | Primer                                             | Reference                                      |
|---------|----------------------------------------------------|------------------------------------------------|
| Axin2   | AGGAGCAGCTCAGCAAAAAG<br>GCTCAGTCGATCCTCTCCAC       | Kurek <i>et al</i> , Stem Cell Reports, 2015   |
| Cdx1    | GCGTTGGTGGTCTGTGTAGA<br>ACGCCCTACGAATGGATG         | qPCR Primer Depot                              |
| Cdx2    | TCAACCTCGCCACAACCTTCCC<br>TGGCTCAGCCTGGGATTGCT     | Rayon <i>et al</i> , Dev Cell, 2014            |
| Cdx4    | AAATTCCTTTTCCAGCTCCA<br>ATGGATGCGCAAAACTGTG        | qPCR Primer Depot                              |
| cTnT    | CAAGGAGCTGTGGCAGAGTA<br>TTCTGGTTGTCATTGATCCG       | Kokkinopoulos <i>et al</i> , Dev Dyn, 2015     |
| CYP26a1 | AGCTGTTCCAAAGTTTCCATGT<br>ACCCACATGTCCTCCAGAAA     | qPCR Primer Depot                              |
| Fgf10   | GTTGCTGTTGATGGCTTTGA<br>GATTGAGAAGAACGGCAAGG       | qPCR Primer Depot                              |
| Foxa2   | TCATGTTGCTCACGGAAGAG<br>TAAAGTATGCTGGGAGCCGT       | qPCR Primer Depot                              |
| Hand1   | CTTTAATCCTCTTCTCGCCG<br>TGAAC TCAAAAAGACGGATGG     | qPCR Primer Depot                              |
| Isl1    | CACGAAGTCGTTCTTGCTGA<br>GGTTAGGGATGGGAAAACCT       | Caprio <i>et al</i> , PNAS, 2014               |
| Kdr     | TCCAGAATCCTCTTCCATGC<br>AAACCTCCTGCAAGCAAATG       | qPCR Primer Depot                              |
| Lhx2    | CCAGCTTCGACAATGAAGT<br>TTTCTGCCG TAAAAGGTTG        | Harel <i>et al</i> , PNAS, 2012                |
| Mixl1   | ACTTTCCAGCTCTTTCAAGAGCC<br>ATTGTGTACTCCCCAACTTTCCC | Costello <i>et al</i> , Nature Letters, 2011   |
| Mlc2v   | AGGGTCACTGAAGGCTGACT<br>GGTCGATCTCCTCTTTGGAG       | Kokkinopoulos <i>et al</i> , Dev Dyn, 2015     |
| Msc     | ACATTCACCCAGTCAACCTG<br>CCACTTCCTTCAGGTCATTCTC     | Sambasivan <i>et al</i> , Dev Cell, 2009       |
| Msgn1   | CTCTGCTTTTCCAGTCCCAG<br>AACCTGGGTGAGACCTTCCT       | qPCR Primer Depot                              |
| Myf5    | GACAGGGCTGTTACATTCAGG<br>TGAGGGAACAGGTGGAGAAC      | qPCR Primer Depot                              |
| MyoD    | GTCGTAGCCATTCTGCCG<br>AGCACTACAGTGGCGACTCA         | qPCR Primer Depot                              |
| MyoG    | GTGGGAGTTGCATTCACTGG<br>CTACAGGCCTTGCTCAGCTC       | qPCR Primer Depot                              |
| Nanog   | AAAGGATGAAGTGCAAGCG<br>TCTGGCTGCTCCAAGTT           | Kurek <i>et al</i> , Stem Cell Reports, 2015   |
| Nkx2.5  | AAGCAACAGCGGTACCTGTC<br>GCTGTGCTTGCACTTGTAG        | Shelton <i>et al</i> , Stem Cell Reports, 2014 |

|                 |                                                 |                                              |
|-----------------|-------------------------------------------------|----------------------------------------------|
| Oct4            | GAACATGTGTAAGCTGCGG<br>CAGACTCCACCTCACACG       | Kurek <i>et al</i> , Stem Cell Reports, 2015 |
| Otx2            | GAAAATCAACTTGCCAGAATCCA<br>GCGGCACTTAGCTCTTCGAT | Iwafuchi-Doi, Development, 2012              |
| Pitx2           | TGTCCACTCGCGAAGAAATC<br>AAGCCATTCTTGCACAGCTC    | Sambasivan <i>et al</i> , Dev Cell, 2009     |
| RALDH2          | GCTCTCCTGTGGCTGGATTA<br>GCCCAACCTCGAGATCAAGT    | qPCR Primer Depot                            |
| Sox17           | TCTTGGGGAAATAGGAAGGC<br>TGGAACCTCCAGTAAGCCAG    | qPCR Primer Depot                            |
| Sox2            | AGCTCGCAGACCTACATGAA<br>CCCTGGAGTGGGAGGAA       | Kurek <i>et al</i> , Stem Cell Reports, 2015 |
| T/Bra           | CATGTACTCTTTCTTGCTGG<br>GGTCTCGGGAAAGCAGTGGC    | Lolas <i>et al</i> , PNAS, 2014              |
| Tbx1            | TGTGGGACGAGTTCAATCAG<br>TGTCATCTACGGGCACAAAG    | Sambasivan <i>et al</i> , Dev Cell, 2009     |
| Tbx1<br>(Set 2) | CATGAGCAGCATGTAGTCGG<br>TGTGGGACGAGTTCAATCAG    | qPCR Primer Depot                            |
| Tbx5            | TGGTTGGAGGTGACTTTGTG<br>GGCAGTGATGACCTGGAGTT    | qPCR Primer Depot                            |
| Tbx6            | GTGTATCCCCACTCCCACAG<br>CCGAGAAAATGGCAGAAACT    | qPCR Primer Depot                            |
| Tcf21           | CTGTAGTTCCACACAAGCGG<br>CGGTTACATTCACCCAGTCA    | qPCR Primer Depot                            |

**Table S5. Human RT-qPCR primers**

| Gene   | Primer                                            | Reference                                   |
|--------|---------------------------------------------------|---------------------------------------------|
| Axin2  | CTGGTGCAAAGACATAGCCA<br>AGTGTGAGGTCCACGGAAAC      | qPCR Primer Depot                           |
| Isl1   | CGCATTGATCCCGTACAAC<br>GTTTTCTCCGGATTTGGAAT       | Harel <i>et al</i> , PNAS, 2012             |
| Mixl1  | CCGAGTCCAGGATCCAGGTA<br>CTCTGACGCCGAGACTTGG       | Mendjan <i>et al</i> , Cell Stem Cell, 2014 |
| Msgn1  | AGAGGGAGAAGCTCAGGATGAG<br>GTGTCTGGATCTTGGTGAGAGG  | qPCR Primer Depot                           |
| Nanog  | TTGGGACTGGTGAAGAATC<br>GATTTGTGGCCTGAAGAAA        | qPCR Primer Depot                           |
| Nkx2.5 | AGCTCATAGACCTGCGCCT<br>AGGACCCTAGAGCCGAAAAG       | qPCR Primer Depot                           |
| Oct4   | CTGGTTTCGCTTTCTCTTTTCG<br>CTTTGAGGCTCTGCAGCTTA    | qPCR Primer Depot                           |
| Otx2   | GCTGTTGTTGCTGTTGTTGG<br>AGAGGAGGTGGCACTGAAAA      | qPCR Primer Depot                           |
| Sox2   | GGAAAGTTGGGATCGAACAA<br>GCCAACCATCTCTGTGGTCT      | qPCR Primer Depot                           |
| T/Bra  | TATGAGCCTCGAATCCACATAGT<br>CCTCGTTCTGATAAGCAGTCAC | qPCR Primer Depot                           |
| Tbx1   | CAGCTTTCACTTCCTTGTCCCT<br>ACCCTGAGGACTGGCCC       | Harel <i>et al</i> , PNAS, 2012             |
| Tbx6   | AGCCTGTGTCTTTCCATCGT<br>GCTGCCCCGAAGTAGGTGTAT     | Mendjan <i>et al</i> , Cell Stem Cell, 2014 |
| Tcf21  | TTCAGGTCACTCTCGGGTTT<br>AGCTACATCGCCCACTTGAG      | Harel <i>et al</i> , PNAS, 2012             |
| Twist1 | TCCATTTTCTCCTTCTCTGGAA<br>GGCTCAGCTACGCCTTCTC     | qPCR Primer Depot                           |

## Supplementary Figures:

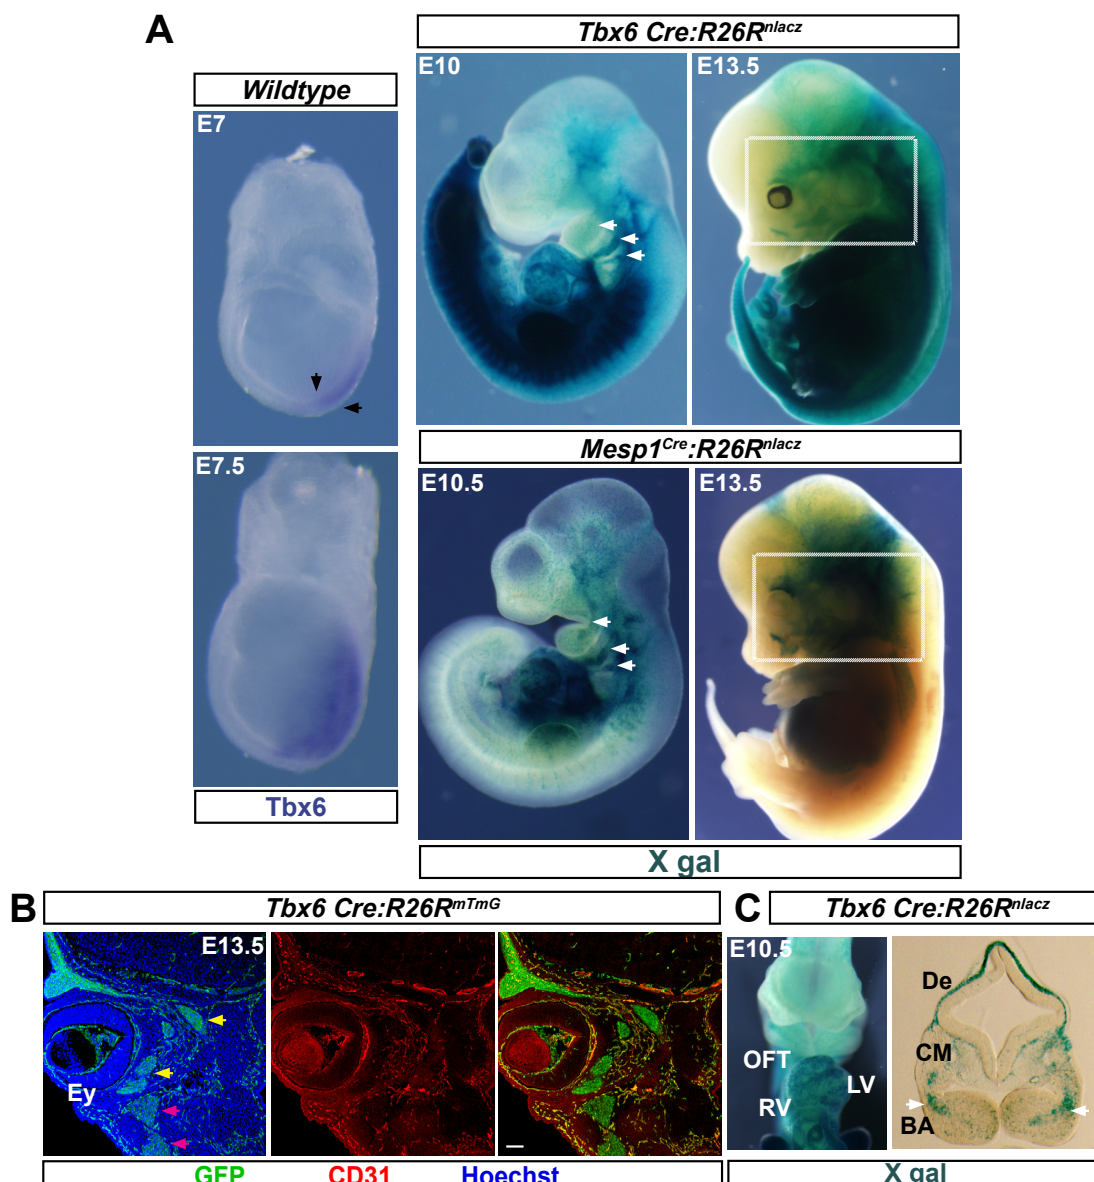

**Figure S1: *Tbx6*-lineage trace marks head mesoderm including its head muscle derivatives.** A) Wholemount ISH (left) on gastrulating mouse embryos. Black arrows, anterior primitive streak. Note, expression in the anterior primitive streak, the source of head mesoderm progenitors. Right panel shows X-gal stained littermates. White arrows, pharyngeal arch-derived muscles; White box highlights head mesoderm derivatives. *Mesp1*<sup>Cre</sup> serves as an example of head mesoderm lineage reporter. B) Immunostaining of a coronal sections of E13.5 head. Note, *Tbx6*-Cre mediated GFP expression in extraocular (yellow arrows) as well as 1<sup>st</sup> and 2<sup>nd</sup> arch muscle progenitors (pink arrows). CD31 co-staining reveals endothelia marked by *Tbx6*-lineage. Scale bar 50  $\mu$ m. C) *Tbx6*-Cre also marks the anterior-most mesoderm, heart, including the first (left ventricle, LV) and second heart field derivatives (Outflow tract, OFT; right ventricle, RV). Repeats are at least 3 embryos and 2 litters.

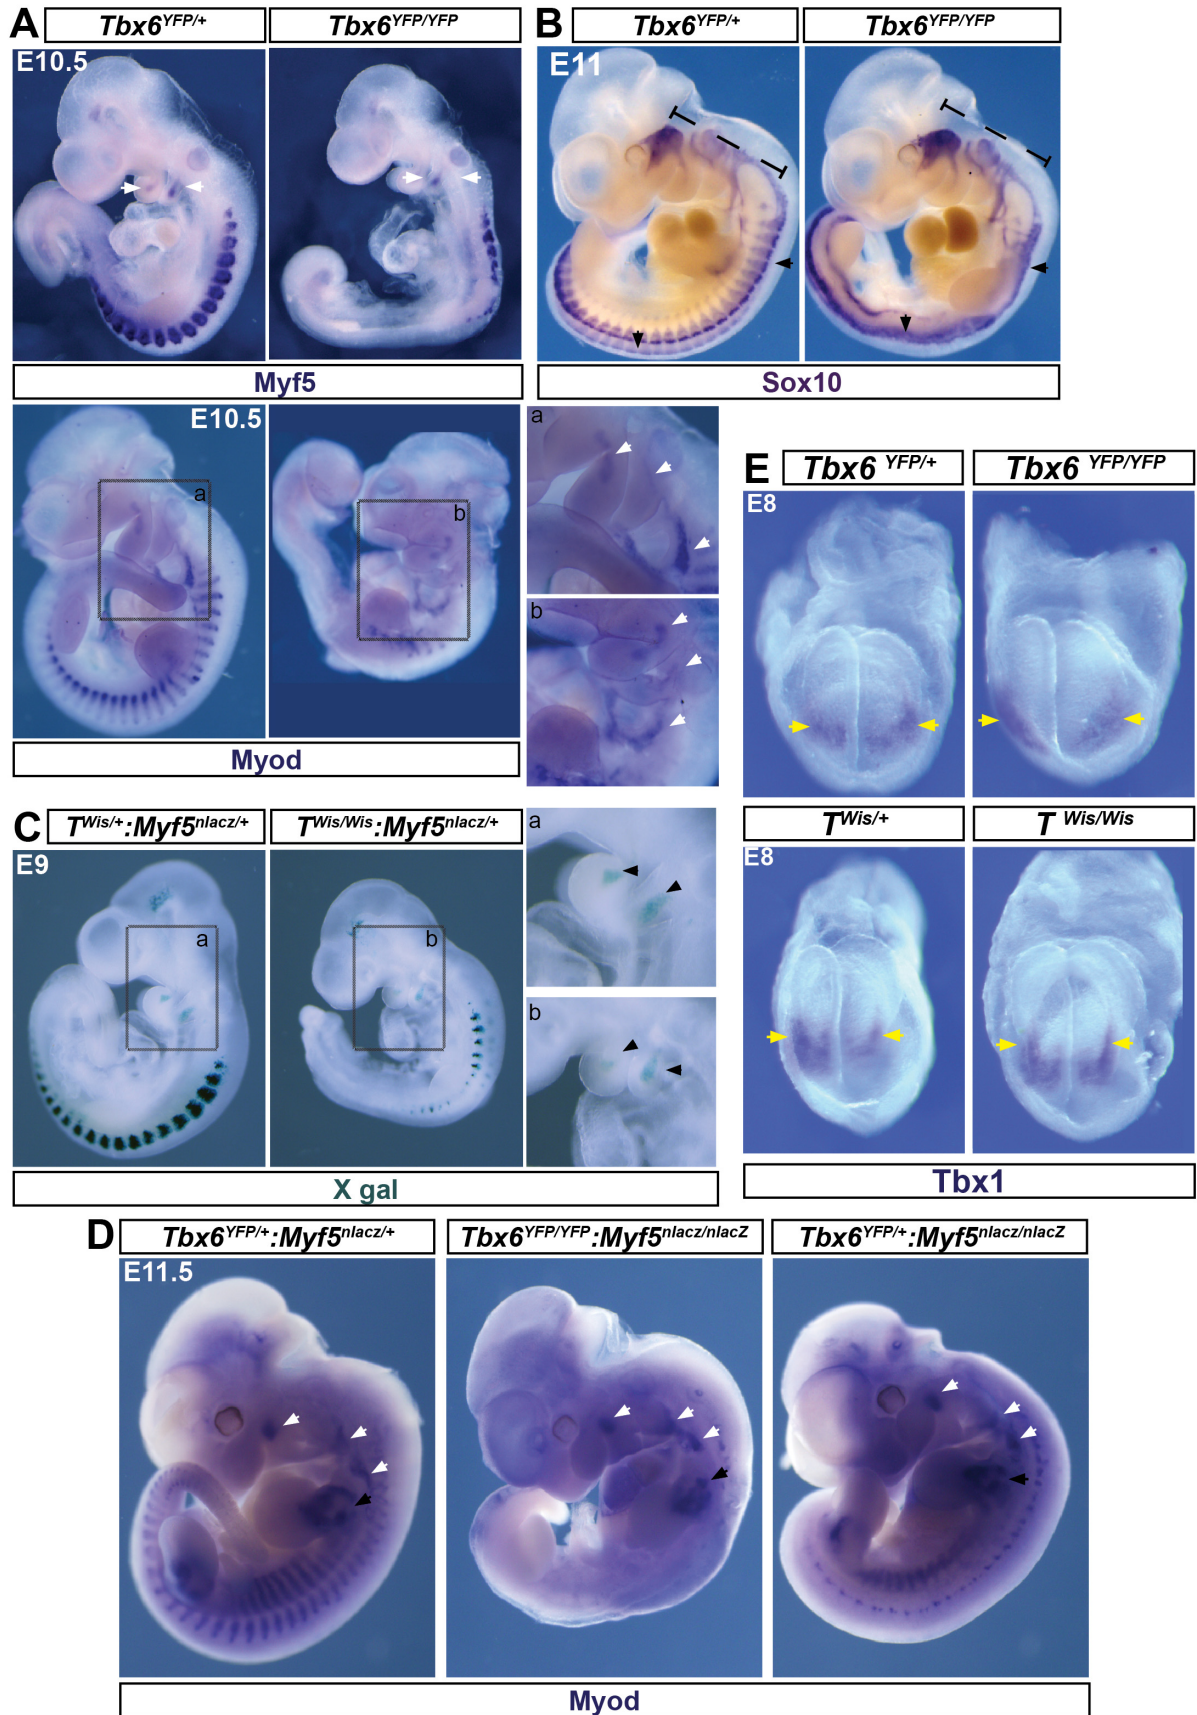



**Figure S2: *T* and *Tbx6* dispensable for head mesoderm and head muscle development unlike that of posterior somitic mesoderm.** A) ISH of littermate embryos. Since neural crest patterning is mesoderm-dependent, neural crest gene *Sox10* serves as an indirect marker of mesoderm development. *Sox10* reveals severe failure to pattern dorsal root ganglia from trunk neural crest (black arrows), while head mesoderm-dependent cranial ganglia appears to pattern and develop normally (dashed line). Note, although the cervical somites are formed in the mutants, the dorsal root ganglia from the neural crest are not patterned. For all ISH, n = 3 mutant embryos, at least. B) ISH of littermate embryos. *Myf5* RNA expression correlates with *Myf5* reporter expression data shown in Figure 1. ISH for *Myod* shows unperturbed progression in myogenic lineage in the pharyngeal arches (white arrowheads). C) Wholemount X gal staining of littermate embryos. No apparent delay in induction of *Myf5* reporter in the pharyngeal arches (black arrowheads). Note, *T* as well as *Tbx6* null mutants shown in A and C are slightly developmentally delayed compared to heterozygous littermates. Accounting for this age difference, the induction of *Myf5* reporter and *Myod* in arch muscle progenitors in mutants appear comparable to that in heterozygote or wildtype controls. D) ISH for *Myod* shows unperturbed progression in myogenic lineage in the pharyngeal arches (white arrowheads) in double nulls compared to age-matched controls. Note, the muscle anlage in the forelimb (black arrowheads) are also formed as in control embryos suggesting unaffected development of migratory muscle progenitors from cervical somites. E) ISH shows unperturbed *Tbx1* induction in a subset of early head mesoderm (yellow arrowheads).

**A**

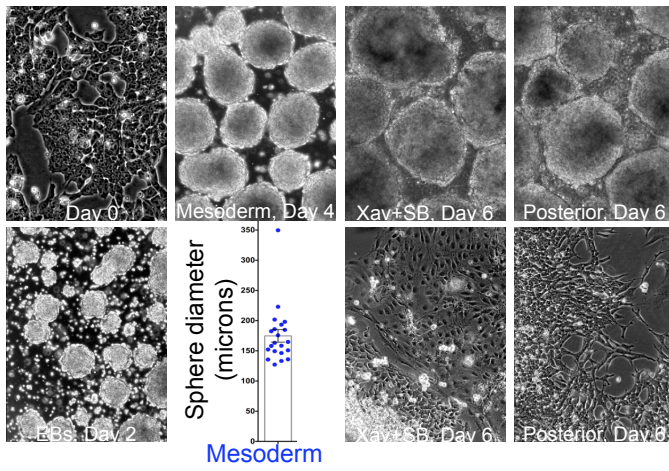

**F**

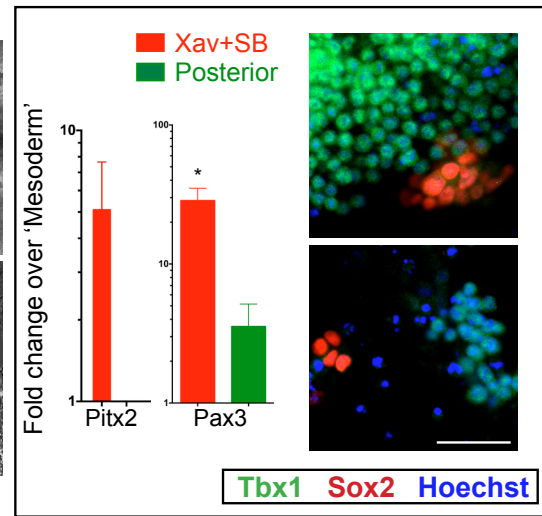

**B**

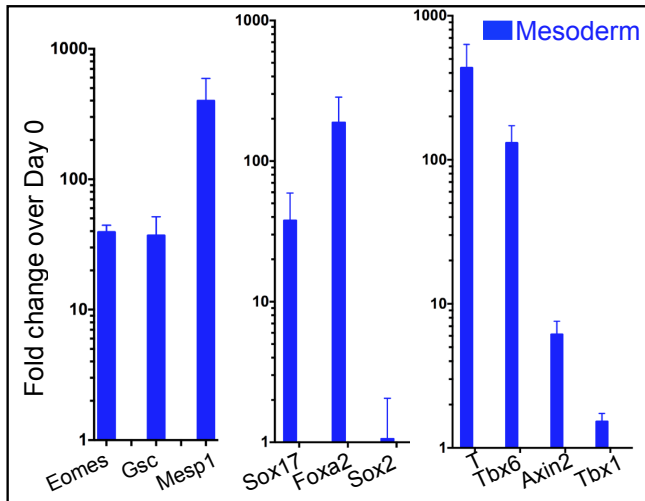

**C**

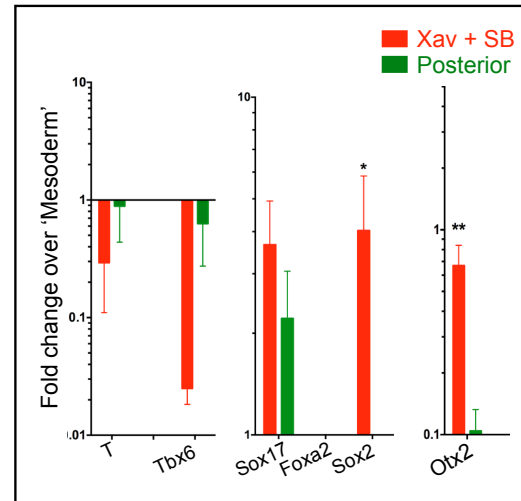

**D**

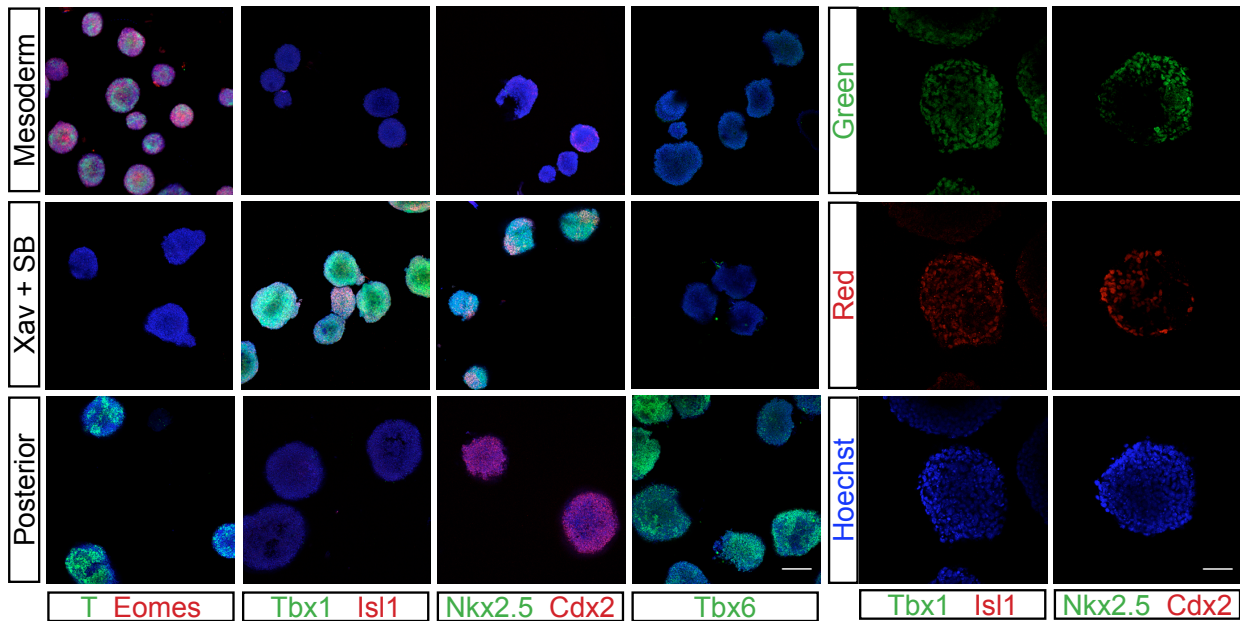

**E**

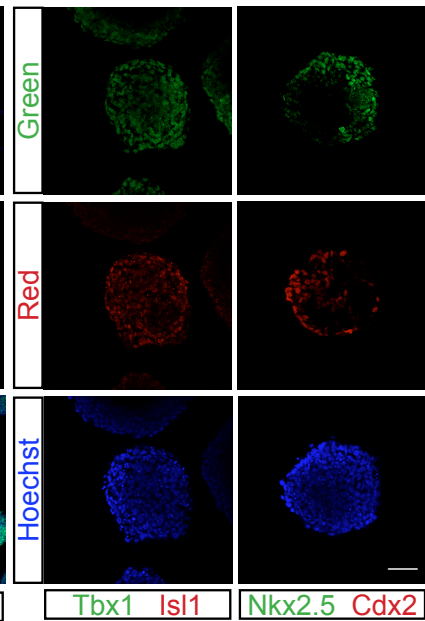

**Figure S3: Inhibition of Wnt and Nodal in cardiopharyngeal mesoderm marker induction.**

A) Micrographs of cultures during the course of differentiation. The panels show embryoid bodies (EBs) and differentiated spheres derived from EBs. The last two panels in the bottom row show corresponding adherent cultures plated on Day 4.

Diameter of Mesoderm spheres in microns:  $174.7 \pm 10.4$  (mean  $\pm$  SEM). n=21 spheres.

B) RT-qPCR analysis for early anterior streak markers (Eomes, Gsc, Mesp1), endoderm (Sox17, Foxa2), neurectoderm (Sox2) and mesoderm (T, Tbx6) markers in 'Mesoderm' condition over Day0. Induction of Wnt pathway is inferred by Axin2 expression.

C) RT-qPCR analysis for mesoderm (T, Tbx6), endoderm (Sox17, Foxa2), neurectoderm (Sox2) and anterior (Otx2) markers at Xav+SB or Posterior, when compared to 'Mesoderm'.

D) View of a larger field of the immunostaining assay. Oct4, pluripotency marker. T, Eomes, mesoderm markers. Tbx1, Isl1, Nkx2.5 cardiopharyngeal mesoderm markers. Tbx6, Cdx2, posterior mesoderm markers. Scale bars 200  $\mu$ m.

E) Split channel view of CPM markers (Tbx1, Isl1, Nkx2.5) and Posterior marker Cdx2 at Xav+SB. For merged image see Fig. 4B. Scale bar 50  $\mu$ m.

F) RT-qPCR data shows induction of Pitx2 and Pax3 in Xav+SB. In the mouse embryos, initially *Pitx2* marks premandibular mesoderm, but is induced later in somites as well (L'Honore et al., 2010). Though not statistically significant, we observed *Pitx2* induction in dual inhibition (Xav+SB; Figure S3E) cultures. Nevertheless, owing to lack of specific markers, premandibular mesoderm identity upon dual inhibition could not be ascertained. Consistent with the upregulation of Sox2 RNA (Figure S3C), immunofluorescence assay shows Sox2+ neural clusters negative for Tbx1. Nearly 20% of the spheres in Xav+SB cultures had a few small clusters positive for Sox1+ (another neural marker; not shown). Pax3 protein was undetectable in these cultures (not shown). Mean values from 3 biological replicates plotted; error bars are SEM; p value calculated by Student's t test, unpaired; \* < 0.05; Scale bar 50  $\mu$ m.

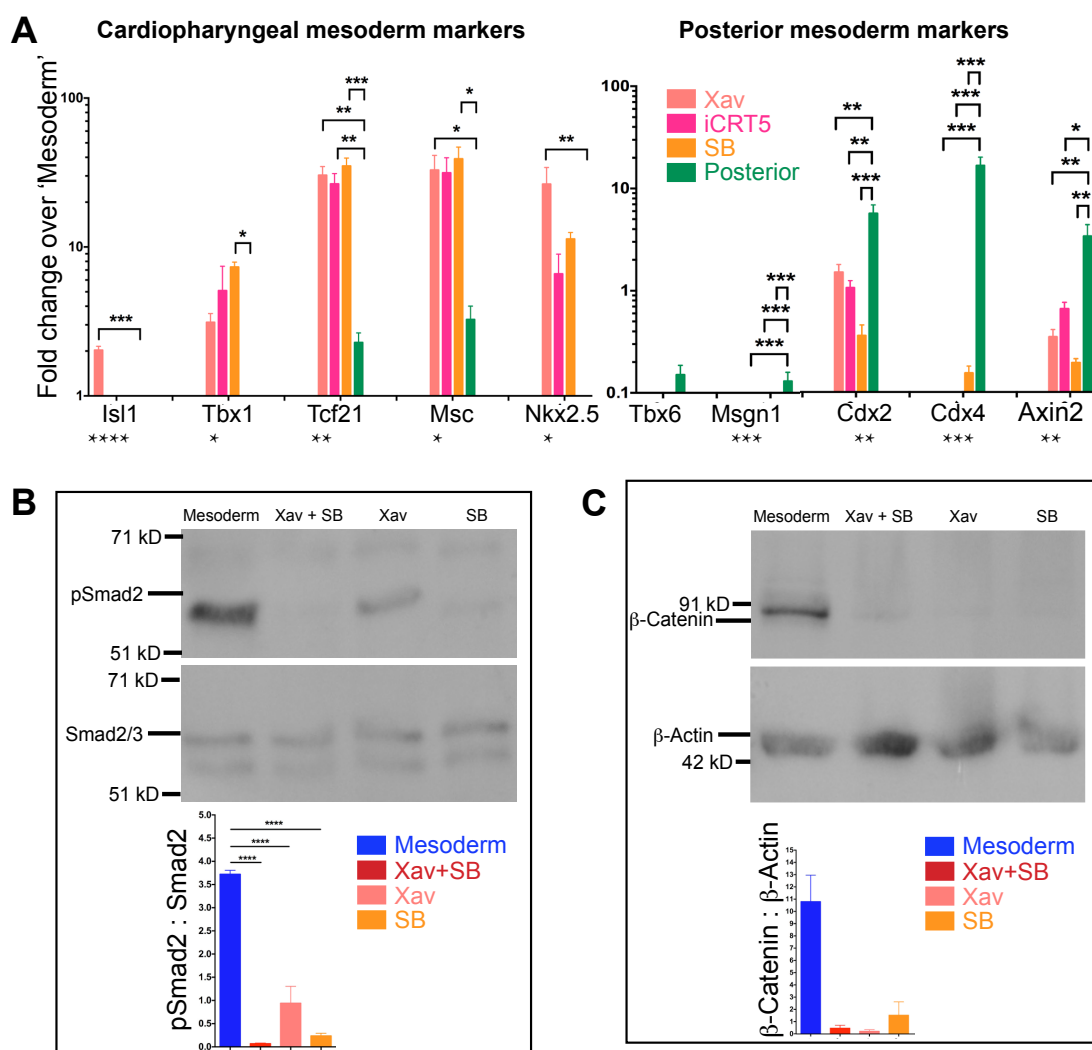

**Figure S4: Cardiopharyngeal mesoderm marker induction in mESC-derived mesoderm by inhibition of Wnt and/or Nodal.**

A) RT-qPCR analysis for marker genes comparing treatments with Wnt antagonist Xav 939 alone (Xav), Wnt/ $\beta$ -catenin transcription response inhibitor iCRT5 alone, Nodal inhibitor SB alone and 'Posterior'. Mean values from 3 biological replicates have been plotted; error bars are SEM; p value calculated by One-way ANOVA is indicated below X-axis. Dunnett's post hoc test was performed by pairwise comparison of individual inhibitor treatment to 'Posterior'. The significance in p value by ANOVA is indicated below X-axis and that of Dunnett's above the bars. \* < 0.05, \*\* < 0.01, \*\*\* < 0.001 and so on.

B) Immunoblot shows reduced phospho-Smad 2 (p-smad2) levels verifying diminished Nodal signaling upon treatment with Xav+SB, Xav alone and SB alone. Molecular weight marker positions are indicated on the left. Histogram indicates levels of phospho-Smad2 normalized to total Smad2. For all histograms, mean values from biological triplicates have been plotted; error bars are SEM; p value calculated by One-way ANOVA is indicated below X-axis. Tukey's post hoc test was performed for pairwise comparisons of individual inhibitor treatments. n=3 experiments. The significance in p value by Tukey's is indicated above the bars. \* < 0.05, \*\* < 0.01, \*\*\* < 0.001, \*\*\*\* < 0.0001 and so on.

C) Immunoblot shows reduced  $\beta$ -catenin levels verifying diminished Wnt signaling upon treatment with Xav+SB, Xav alone and SB alone. Molecular weight marker positions are indicated on the left. Histogram indicates levels of  $\beta$ -catenin with respect to  $\beta$ -Actin. For all histograms, mean values from biological duplicates have been plotted; error bars are SEM. n=2 experiments.

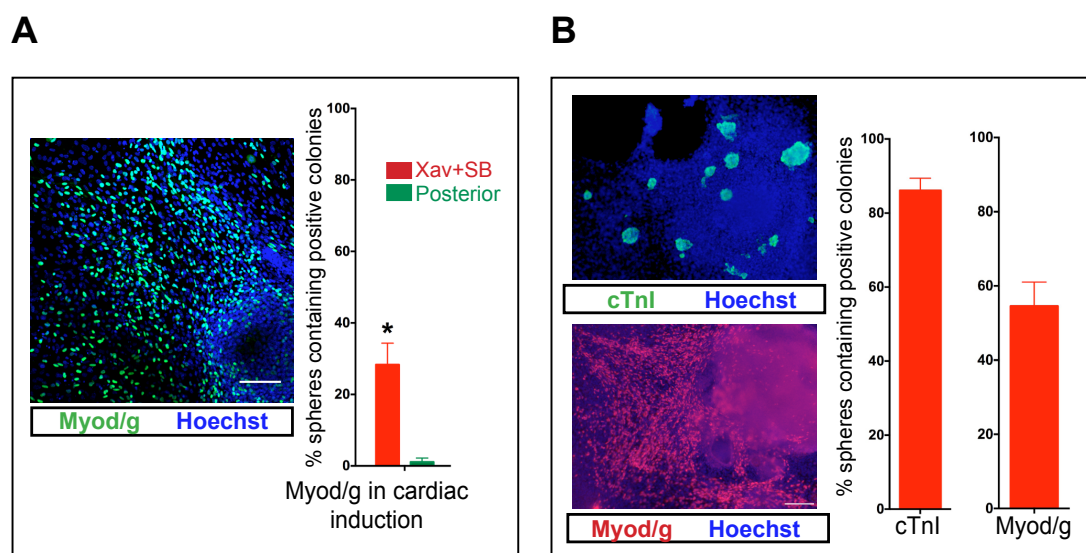

**Figure S5: Dual differentiation potential of *in vitro* CPM-like population.**

A) Immunostaining shows skeletal muscle differentiation in cardiogenic culture condition. Proportion of spheres associated with Myod/Myog positive clusters in cardiogenic cultures is  $28.3 \pm 6\%$  (mean  $\pm$  SEM) in Xav+SB-derived and  $1.1 \pm 1.1\%$  in 'Posterior' derived cultures. Mean values from 3 biological replicates plotted; error bars are SEM; p value calculated by Student's t test, unpaired; \* < 0.05; \*\* < 0.01; scale bar 100  $\mu$ m.

B) Immunostaining shows skeletal and cardiac muscle differentiation from another mESC line (B6D2) when Xav+SB cells were differentiated in N2B27 containing media. Proportion of spheres associated with cardiac TroponinI positive clusters is  $86.1 \pm 3.3\%$  (mean  $\pm$  SEM) and proportion of spheres associated with Myod/Myog positive clusters is  $54.5 \pm 6.5\%$ . Mean values from 6 biological replicates plotted; error bars are SEM; scale bar 50  $\mu$ m.

## Supplementary References:

- Caprio, C. and Baldini, A.** (2014). p53 suppression partially rescues the mutant phenotype in mouse models of DiGeorge syndrome. *Proc. Natl. Acad. Sci.* **111**, 13385–13390.
- Costello, I., Pimeisl, I.-M., Dräger, S., Bikoff, E. K., Robertson, E. J. and Arnold, S. J.** (2011). The T-box transcription factor Eomesodermin acts upstream of *Mesp1* to specify cardiac mesoderm during mouse gastrulation. *Nat. Cell Biol.* **13**, 1084–1091.
- Hadjantonakis, A. K., Pisano, E. and Papaioannou, V. E.** (2008). *Tbx6* regulates left/right patterning in mouse embryos through effects on nodal cilia and perinodal signaling. *PLoS One* **3**, e2511.
- Harel, I., Maezawa, Y., Avraham, R., Rinon, A., Ma, H.-Y., Cross, J. W., Leviatan, N., Hegesh, J., Roy, A., Jacob-Hirsch, J., et al.** (2012). Pharyngeal mesoderm regulatory network controls cardiac and head muscle morphogenesis. *Proc. Natl. Acad. Sci.* **109**, 18839–18844.
- Iwafuchi-Doi, M., Matsuda, K., Murakami, K., Niwa, H., Tesar, P. J., Aruga, J., Matsuo, I. and Kondoh, H.** (2012). Transcriptional regulatory networks in epiblast cells and during anterior neural plate development as modeled in epiblast stem cells. *Development* **139**, 4675–4675.
- Javali, A., Misra, A., Leonavicius, K., Acharyya, D., Vyas, B. and Sambasivan, R.** (2017). Co-expression of *Tbx6* and *Sox2* identifies a novel transient neuromesoderm progenitor cell state. *Development* **144**, 4522–4529.
- Jho, E., Zhang, T., Domon, C., Joo, C., Freund, J. and Costantini, F.** (2002). Wnt /  $\beta$ -Catenin / Tcf Signaling Induces the Transcription of *Axin2*, a Negative Regulator of the Signaling Pathway Wnt /  $\beta$ -Catenin / Tcf Signaling Induces the Transcription of *Axin2*, a Negative Regulator of the Signaling Pathway. *Mol. Cell. Biol.* **22**, 1172–1183.
- Kokkinopoulos, I., Ishida, H., Saba, R., Coppen, S., Suzuki, K. and Yashiro, K.** (2016). Cardiomyocyte Differentiation From Mouse Embryonic Stem Cells Using a Simple and Defined Protocol. *Dev Dyn* **157**–165.
- Kurek, D., Neagu, A., Tastemel, M., Tüysüz, N., Lehmann, J., Van De Werken, H. J. G., Philipsen, S., Van Der Linden, R., Maas, A., Van Ijcken, W. F. J., et al.** (2015). Endogenous WNT signals mediate BMP-induced and spontaneous differentiation of epiblast stem cells and human embryonic stem cells. *Stem Cell Reports* **4**, 114–128.
- L'Honore, A., Ouimette, J. F., Lavertu-Jolin, M. and Drouin, J.** (2010). *Pitx2* defines alternate pathways acting through *MyoD* during limb and somitic myogenesis. *Development* **137**, 3847–3856.
- Lolas, M., Valenzuela, P. D. T., Tjian, R. and Liu, Z.** (2014). Charting Brachyury-mediated developmental pathways during early mouse embryogenesis. *Proc. Natl. Acad. Sci. U. S. A.* **111**, 4478–83.
- Mendjan, S., Mascetti, V. L., Ortmann, D., Ortiz, M., Karjosukarso, D. W., Ng, Y., Moreau, T. and Pedersen, R. A.** (2014). NANOG and CDX2 Pattern Distinct Subtypes of Human Mesoderm during Exit from Pluripotency. *Cell Stem Cell* **1**–16.
- Muzumdar, M. D., Tasic, B., Miyamichi, K., Li, L. and Luo, L.** (2007). A global double-fluorescent Cre reporter mouse. *Genesis* **45**, 593–605.
- Rayon, T., Menchero, S., Nieto, A., Xenopoulos, P., Crespo, M., Cockburn, K., Cañon, S., Sasaki, H., Hadjantonakis, A. K., de la Pompa, J. L., et al.** (2014). Notch and Hippo Converge on *Cdx2* to Specify the Trophoblast Lineage in the Mouse Blastocyst. *Dev. Cell* **30**, 410–422.
- Saga, Y., Miyagawa-Tomita, S., Takagi, a, Kitajima, S., Miyazaki, J. I. and Inoue, T.** (1999). *MesP1* is expressed in the heart precursor cells and required for the formation of a single heart tube. *Development* **126**, 3437–47.
- Sambasivan, R., Gayraud-Morel, B., Dumas, G., Cimper, C., Paisant, S., Kelly, R. G. and Tajbakhsh, S.** (2009). Distinct regulatory cascades govern extraocular and pharyngeal arch muscle progenitor cell fates. *Dev Cell* **16**, 810–821.
- Shedlovsky, A., King, T. R. and Dove, W. F.** (1988). Saturation germ line mutagenesis of the murine *t* region including a lethal allele at the quaking locus. *Proc Natl Acad Sci U S A* **85**, 180–184.
- Shelton, M., Metz, J., Liu, J., Carpenedo, R. L., Demers, S. P., Stanford, W. L. and Skerjanc, I. S.** (2014). Derivation and expansion of PAX7-positive muscle progenitors from human and mouse embryonic stem cells. *Stem Cell Reports* **3**, 516–529.
- Tajbakhsh, S., Rocancourt, D., Cossu, G. and Buckingham, M.** (1997). Redefining the genetic hierarchies controlling skeletal myogenesis: Pax-3 and Myf-5 act upstream of MyoD. *Cell* **89**, 127–138.
- Tzouanacou, E., Wegener, A., Wymeersch, F. J., Wilson, V. and Nicolas, J.-F.** (2009). Redefining the progression of lineage segregations during mammalian embryogenesis by clonal analysis. *Dev. Cell* **17**, 365–76.
- Vallier, L. and Pedersen, R. A.** (2008). Differentiation of Human Embryonic Stem Cells in Adherent and in Chemically Defined Culture Conditions. In *Current Protocols in Stem Cell Biology*, p. 4:1D.4.1-1D.4.7.
